# Supplementary material for: Targeted detection of genetic alterations reveal the prognostic impact of H3K27M and MAPK pathway aberrations in paediatric thalamic glioma
Source: Acta Neuropathol Commun. 2016 Aug 31;4(1):93. doi: 10.1186/s40478-016-0353-0 (PMC5006436; doi:10.1186/s40478-016-0353-0)
Supplement: Additional file 2: Table S2. — Canadian cohort details. (XLSX 11 kb) [file 40478_2016_353_MOESM2_ESM.xlsx]

## Sheet: Sheet1
Sample ID	Diagnosis	Location	Sex	Age at Diagnosis (yrs)	Status	Overal Survival (yrs)	Recurrence	Extent of Surgery	Chemotherapy	Radiation	H3K27M Status	H3G34V/R Status	BRAFV600E Status	KIAA1549-BRAF	BRAF-TACC	FGFR1N546K Status
TL001B	Pilocytic Astrocyoma	Thalamus	Female	7.97534	Alive	9.93056		Gross Total	Treatment	No Treatment	WT	WT	WT	WT	WT	WT
TL002B	Diffuse Astrocytoma	Thalamus	Female	15.8959	Alive	1.56111		Gross Total	Treatment	Treatment	WT	WT	V600E	WT	WT	WT
TL003B	Pilocytic Astrocyoma	Thalamus	Male	4.12329	Alive	4.89167		Subtotal	Treatment	Treatment	WT	WT	WT	KIAA1549 15:9	WT	WT
TL004B	Diffuse Astrocytoma	Thalamus	Male	15.2877	Alive	3.14444		Subtotal	Treatment	Treatment	WT	WT	V600E	WT	WT	WT
TL005B	Anaplastic Astrocytoma	Thalamus	Female	6.18904	Dead	2.24444		Subtotal	No Treatment	Treatment	WT	WT	WT	WT	WT	WT
TL006B	Anaplastic Astrocytoma	Thalamus	Male	5.23288	Dead	0.508333		Subtotal	Treatment	Treatment	K27M	WT	WT	WT	WT	WT
TL007B	Pilocytic Astrocyoma	Thalamus	Male	3.67945	Alive	2.99722		Subtotal	No Treatment	No Treatment	WT	WT	WT	KIAA1549 16:9	WT	WT
TL008B	Pilocytic Astrocyoma	Thalamus	Female	4.53699	Alive	4.33333		Gross Total	Treatment	Treatment	WT	WT	WT	KIAA1549 16:9	WT	WT
TL009B	Anaplastic Astrocytoma	Thalamus	Female	11.6603	Dead	0.625		Subtotal	No Treatment	No Treatment	K27M	WT	WT	WT	WT	WT
TL010B	Pilocytic Astrocyoma	Thalamus	Female	10.4685	Alive	2.33889		Subtotal	Treatment	No Treatment	WT	WT	WT	Insuff. RNA Quality	WT	WT
TL011B	Diffuse Astrocytoma	Thalamus	Female	15.2055	Alive	4.41389		Subtotal	Treatment	Treatment	WT	WT	V600E	WT	WT	WT
TL012B	Anaplastic Astrocytoma	Thalamus	Female	4.91507	Dead	0.552778		Partial	No Treatment	No Treatment	WT	WT	WT	WT	WT	WT
TL013B	Pilocytic Astrocytoma	Thalamus	Female	0.663014	Alive	5.58611		Gross Total	No Treatment	Treatment	WT	WT	WT	WT	WT	WT
TL014B	Anaplastic Astrocytoma	Thalamus	Female	12.737	Dead	0.830556		Unknown	No Treatment	No Treatment	K27M	WT	WT	WT	WT	WT
TL015B	Glioblastoma	Thalamus	Male	13.0712	Dead	1.59167		Unknown	Treatment	Treatment	K27M	WT	WT	WT	WT	WT
TL016B	Glioblastoma	Thalamus	Male	9.15616	Dead	0.388889		Subtotal	No Treatment	No Treatment	K27M	WT	WT	WT	WT	WT
